# Supplementary material
Source: Frontiers journal article supplement (https://www.frontiersin.org/articles/222019)
Supplement: Table_1.PDF [file Table_1.PDF]

**Densitometric analysis of dot blot experiments with the supernatants of the adsorption reaction with QM B1551 spores ( fig.1B)**

| <b>mRFP source</b>   | <b>Amount of sample used</b> | <b>Density (OD/mm2) <sup>a</sup></b> | <b>Amount of mRFP (ng) <sup>b</sup></b> | <b>mRFP µg (% total)</b> |
|----------------------|------------------------------|--------------------------------------|-----------------------------------------|--------------------------|
| <b>Purified mRFP</b> | 100.00 ng                    | 565.31                               | NA                                      | NA                       |
|                      | 50.00 ng                     | 279.67                               | NA                                      | NA                       |
|                      | 25.00 ng                     | 139.18                               | NA                                      | NA                       |
|                      | 12.50 ng                     | 56.84                                | NA                                      | NA                       |
|                      | 6.25 ng                      | 38.73                                | NA                                      | NA                       |
| <b>unbound mRFP</b>  | 40.0 µl                      | 89.00                                | 16.69                                   | 0.50 (0.55%)             |
|                      | 20.0 µl                      | 77.31                                | 11.05                                   |                          |
|                      | 10.0 µl                      | 47.30                                | 6.95                                    |                          |

---

<sup>a</sup> Density measured by optical density (OD) per square millimeter and obtained by ChemiDocXRS apparatus with Quantity-One software (Bio-Rad).

<sup>b</sup> Calculated from signals (density OD/mm2) obtained with purified mRFP.  
NA, not applicable.
